# Supplementary figures and images for: A Novel Marine Mammal Coxiella burnetii—Genome Sequencing Identifies a New Genotype with Potential Virulence
Source: MDPI journal article supplement (doi:10.3390/pathogens12070893), 2023-06-29

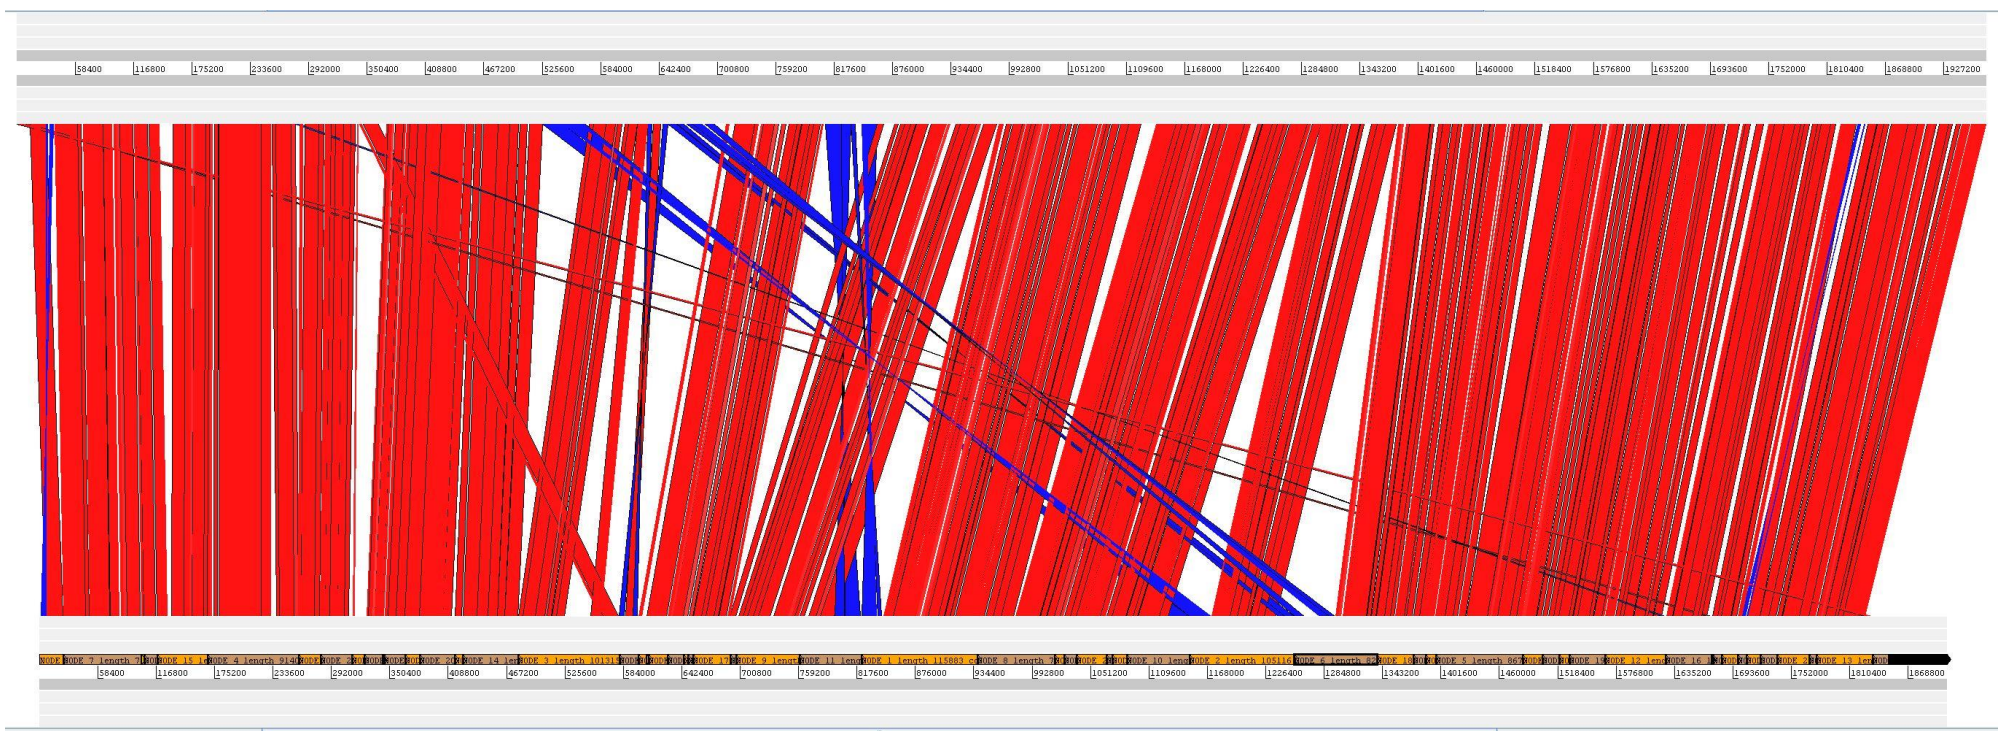

Supplement: s1 [file s1]
